# Supplementary material for: Safety, Immunogenicity, and Protective Efficacy of an H5N1 Chimeric Cold-Adapted Attenuated Virus Vaccine in a Mouse Model
Source: MDPI journal article supplement (doi:10.3390/v13122420), 2021-12-03
Supplement: s1 [file s1]

**Table S1.** The PCR amplification primers for IBV full genomes.

| Amplified fragments | Forward Primer (5'-3') | Reverse Primer (5'-3')          |
|---------------------|------------------------|---------------------------------|
| PB2                 | CCAGCAGAAGCGGAGCGTTT   | TTATGAGAAACACGAGCATTTTTCACTC    |
| PB1                 | CCAGCAGAAGCGGAGCCTTT   | TTAGTAGAAACACGAGCCTTTTTTCA      |
| PA                  | CCAGCAGAAGCGGTGCGTTT   | TTAGTAGAAACACGTGCATTTTAAATTC    |
| HA                  | CCAGCAGAAGCAGAGCATTTTC | TTAGTAGTAACAAGAGCATTTTTCAATAACG |
| NP                  | CCAGCAGAAGCACAGCA      | TTAGTAGAAACAACAGCATTTTTT        |
| NA                  | CCAGCAGAAGCAGAGCATC    | TTAGTAGTAACAAGAGCATTTTTTCAG     |
| M                   | CCAGCAGAAGCACGCACT     | TTAGTAGAAACAACGCACTTTTTTC       |
| NS                  | CCAGCAGAAGCAGAGCA      | TTAGTAGTAACAAGAGGATTTTTTAT      |

| Source              | Catalog No. | Strain Name                              | Subtype | Clade                | Molecule <sup>a</sup> | Express System | Tags            | GenBank/GISAID <sup>b</sup> |
|---------------------|-------------|------------------------------------------|---------|----------------------|-----------------------|----------------|-----------------|-----------------------------|
| Sino Biological     | 40024-V08B  | A/Goose/Guangdong/1/96                   | H5N1    | 0                    | HA1+ HA2              | Baculovirus    | His             | YP_308669.1                 |
| Sino Biological     | 11689-V08H  | A/Hong Kong/483/97                       | H5N1    | 0                    | HA1+ HA2              | Human cells    | His             | AAC32099.1                  |
| Sino Biological     | 11713-V08H  | A/Hong kong/213/2003                     | H5N1    | 1                    | HA1+ HA2              | Human cells    | His             | ABP51975.1                  |
| Sino Biological     | 10003-V06H3 | A/VietNam/1203/ 2004                     | H5N1    | 1                    | HA1+ HA2              | Human cells    | His+ Fc (mouse) | AAW80717.1                  |
| Sino Biological     | 11710-V08B  | A/Cambodia/R0405050/2007                 | H5N1    | 1.1                  | HA1+HA2               | Baculovirus    | His             | n.s.                        |
| Sino Biological     | 40026-V08H  | A/Cambodia/S12 11394/2008                | H5N1    | 1.1                  | HA1+ HA2              | Human cells    | His             | ADM95445.1                  |
| Sino Biological     | 11698-V08H  | A/duck/Human/79 5/2002                   | H5N1    | 2.1.1                | IIA1+ HA2             | Human cells    | His             | ACA47835.1                  |
| Sino Biological     | 11060-V08H2 | A/Indonesia/5/20 05                      | H5N1    | 2.1.3.2              | HA1+ HA2              | Human cells    | His             | ABW06108.1                  |
| Sino Biological     | 40004-V08H  | A/Xinjiang/1/2006                        | H5N1    | 2.2                  | IIA1+ IIA2            | Human cells    | His             | ACJ68614.1                  |
| Sino Biological     | 40117-V08B  | A/bar-headed goose/Qinghai/1A /2005      | H5N1    | 2.2                  | HA1+ HA2              | Baculovirus    | His             | ABF93441.1                  |
| Sino Biological     | 11697-V08H  | A/Egypt/2321- NAMRU3/2007                | H5N1    | 2.2.1                | HA1+ HA2              | Human cells    | His             | ABP96850.1                  |
| Cambridge Biologics | 01-02-0546  | A/Egypt/N03072/2010                      | H5N1    | 2.2.1                | IIA1                  | Human cells    | His             | EP1255379                   |
| Sino Biological     | 40049-V08H1 | A/Egypt/3300- NAMRU3/2008                | H5N1    | 2.2.1.1              | HA1                   | Human cells    | His             | ACI06185.1                  |
| Sino Biological     | 11048-V08H1 | A/Anhui/1/2005                           | H5N1    | 2.3.4                | IIA1+ IIA2            | Human cells    | His             | ABD28180.1                  |
| Sino Biological     | 11694-V08H  | A/Japanese white-eye/Hong Kong/1038/2006 | H5N1    | 2.3.4                | IIA1+ IIA2            | Human cells    | His             | ABJ97765.1                  |
| Cambridge Biologics | 01-02-0555  | A/chicken/Bangladesh/11rs1984-30/2011    | H5N1    | 2.3.4.2              | HA1                   | Human cells    | His             | AEQ50043                    |
| Cambridge Biologics | 01-02-0570  | A/Guizhou/1/2013                         | H5N1    | 2.3.4.2              | HA1                   | Human cells    | His             | n.s.                        |
| Sino Biological     | 40022-V08H1 | A/Vietnam/UT1314 13H/2008                | H5N1    | 2.3.4.3              | HA1                   | Human cells    | His             | ADF83651.1                  |
| Sino Biological     | 40088-V08H1 | A/chicken/Yamaguchi/7/2004               | H5N1    | 2.5                  | IIA1                  | Human cells    | His             | BAD89305.1                  |
| Sino Biological     | 11690-V08H  | A/goose/Guizhou/337/2006                 | H5N1    | 4                    | HA1+ HA2              | Human cells    | His             | ABJ96698.1                  |
| Sino Biological     | 40372-V08B  | A/chicken/Jilin/9/ 2004                  | H5N1    | 5 (1-2-5-6-8-9-like) | HA1+ HA2              | Baculovirus    | His             | AA176166.1                  |
| Sino Biological     | 40158-V08B2 | A/chicken/VietNam/NCVD-016/2008          | H5N1    | 7.1                  | HA1+ HA2              | Baculovirus    | His             | ACO07033.1                  |
| Cambridge Biologics | 01-02-0542  | A/chicken/Viet Nam/NCVD-03/2008          | H5N1    | 7.1                  | HA1                   | Human cells    | His             | n.s.                        |
| Sino Biological     | 40015-V08B  | A/Hubei/1/2010                           | H5N1    | 2.3.2.1a             | HA1+ HA2              | Baculovirus    | His             | AEO89181.1                  |
| Sino Biological     | 40160-V08B1 | A/barnswallow/HongKong/D10-1161/2010     | H5N1    | 2.3.2.1b             | IIA1+ IIA2            | Baculovirus    | His             | AGC13463.1                  |
| Sino Biological     | 40044-V08H  | A/common magpie/Hong Kong/5052/2007      | H5N1    | 2.3.2.1              | HA1+ HA2              | Human cells    | His             | ACJ26242.1                  |
| Sino Biological     | MF15JU2412  | A/Chicken/Guizhou/1153/2016              | H5N1    | 2.3.2.1d             | HA1+ HA2              | Baculovirus    | His             | MT126478.1                  |
| Cambridge Biologics | 01-02-0575  | A/chicken/Ghana/20/2015                  | H5N1    | 2.3.2.1f             | IIA1                  | Human cells    | His             | AMX74637                    |
| Sino Biological     | 40495-V08B  | A/Sichuan/26221/2014                     | H5N6    | 2.3.4.4a             | IIA1+ IIA2            | Baculovirus    | His             | EP1533583                   |
| Cambridge Biologics | 01-02-0572  | A/tufted duck/Germany-SH/R8444/2016      | H5N8    | 2.3.4.4b             | IIA1                  | Human cells    | His             | EPI860509                   |
| Sino Biological     | MF15JI.0521 | A/Tujian-Sanyuan/21099/2017              | H5N6    | 2.3.4.4b             | IIA1+ IIA2            | Baculovirus    | His             | EP11202729                  |
| Cambridge Biologics | 01-02-0566  | A/Cygnus atratus/Hubei/2Z2-O/2016        | H5N8    | 2.3.4.4b             | IIA1                  | Human cells    | His             | ART29846                    |
| Cambridge Biologics | 01-02-0569  | A/northern pintail/Washington/40964/2014 | H5N2    | 2.3.4.4c             | IIA1                  | Human cells    | His             | n.s.                        |
| Cambridge Biologics | 01-02-0571  | A/chicken/Iowa/04-20/2015                | H5N2    | 2.3.4.4c             | HA1                   | Human cells    | His             | AKG52687                    |
| Cambridge Biologics | 01-02-0573  | A/Hubei/29578/2016                       | H5N6    | 2.3.4.4d             | HA1                   | Human cells    | His             | n.s.                        |
| Cambridge Biologics | 01-02-0565  | A/chicken/Hubei/ZYSJF11/2016             | H5N6    | 2.3.4.4d             | IIA1                  | Human cells    | His             | n.s.                        |
| Cambridge Biologics | 01-02-0574  | A/duck/Hyogo/1/2016                      | H5N6    | 2.3.4.4c             | HA1                   | Human cells    | His             | n.s.                        |
| Sino Biological     | 40465-V08B  | A/duck/Guangdong/GD01/2014               | H5N6    | 2.3.4.4f             | IIA1+ IIA2            | Baculovirus    | His             | AIA24403.1                  |
| Sino Biological     | MF15JI.0221 | A/Guangdong/18SF020/2018                 | H5N6    | 2.3.4.4h             | HA1+ HA2              | Baculovirus    | His             | EP11352813                  |

<sup>a</sup> IIA1, hemagglutinin head; IIA2, hemagglutinin stem;  
<sup>b</sup> n.s., not supplied by company.

**Figure S1.** All H5 HA proteins listed in the protein microarrays. The purified HA proteins were obtained from Sino Biological and Cambridge Biologics. These HA proteins belong to different clades of H5 subtype influenza virus. The figure shows the virus strain, subtype, GenBank/GISAID number, clade or subclade, cell expression system, and catalog number for each HA protein..
